# Supplementary material for: Lactococcus lactis subsp. cremoris C60 Upregulates Macrophage Function by Modifying Metabolic Preference in Enhanced Anti-Tumor Immunity
Source: MDPI journal article supplement (doi:10.3390/cancers16101928), 2024-05-18
Supplement: s1 [file s1]

# ***Lactococcus lactis* subsp. *cremoris* C60 upregulates macrophage function by modifying metabolic preference in enhanced anti-tumor immunity**

Suguru Saito\*, Duo-Yao Cao, Toshio Maekawa, Noriko M. Tsuji and Alato Okuno\*

\*Correspondence: Suguru Saito, Ph.D., E-mail: Suguru.Saito@cshs.org, Tel: +1-213-823-0661; Alato Okuno, Ph.D., E-mail: a-okuno@shibata.ac.jp

---

## ***Supplementary Materials***

### **Supplementary Protocol**

#### *Thioglycolate-elicited peritoneal macrophages (TPMs) preparation*

The mice received an intraperitoneal (i.p.) injection of 3 mL of thioglycolate and the infiltrated leukocytes were harvested from the peritoneum at day 4 (between 84 to 96 h) post injection. The cells were seeded into 100 mm cell culture dishes in RPMI complete medium (RPMI1640 supplemented with 10% of FBS, 100 U/mL of penicillin and 100 µg/mL of streptomycin) and incubated at 37°C for 3 h. The adherent cells, which are enriched TPMs, were washed with PBS three times and then detached by gentle scraping in PBS/2% FBS. The purity of TPMs was assessed by flow cytometry. The samples with more than 90% of CD11b+F4/80+ population were used for subsequent experiments.

#### *Fragmented C60-CWE injection and tumor inoculation*

The mice received i.p. injection of saline (200 µL) or fragmented (f)C60-CWE (200 µL of suspension derived from  $1.0 \times 10^9$  CFU/mL in saline) every 3 day for 28 days. In day 14 of i.p. injection, the mice received tumor inoculation ( $1.0 \times 10^6$  of B16-OVA cells in 100 µL of PBS) on the back skin by subcutaneous (s.c.) injection. Tumor volume was measured at day 7 and day 14 after tumor inoculation in each mouse. For some experiments, macrophages were isolated from spleen or liver using EasySep™ Mouse F4/80 Positive Selection Kit (Stemcell Technologies) in the mice received i.p. injection for 14 days (non-tumor). The purity of macrophages was assessed by flow cytometry, and samples with more than 90% of CD11b+F4/80+ population were used for experiments. The isolated macrophages were subjected to *in vitro* stimulation assay. The macrophages ( $2.5 \times 10^6$ /mL) were cultured with vehicle (PBS) or LPS (1 µg/mL) at 37°C for 6 h, then CD86 expression was analyzed by flow cytometry.

## Supplementary Table

**Table S1. Antibody list for flow cytometry**

| Antigen                                | Fluorochrome         | Clone    | Company   |
|----------------------------------------|----------------------|----------|-----------|
| CD3                                    | FITC                 | 17A2     | BioLegend |
| CD4                                    | APC                  | GK1.5    | BioLegend |
| CD8                                    | Pacific Blue         | 53-6.7   | BioLegend |
| CD11b                                  | PE-Cy7               | M1/70    | BioLegend |
| CD45                                   | PerCP-Cy5.5, PE-Cy7  | 30-F11   | BioLegend |
| CD69                                   | PE                   | H1.2F3   | BioLegend |
| CD80                                   | FITC                 | 16-10A1  | BioLegend |
| CD86                                   | APC                  | GL-1     | BioLegend |
| CD163                                  | APC-Cy7              | S15049F  | BioLegend |
| CD206                                  | Brilliant Violet 711 | C068C2   | BioLegend |
| F4/80                                  | Brilliant Violet 650 | BM8      | BioLegend |
| I-A <sup>b</sup>                       | FITC                 | 25-9-17  | BioLegend |
| H-2K <sup>b</sup>                      | Pacific Blue         | AF6-88.5 | BioLegend |
| TNF- $\alpha$                          | APC, PerCP-Cy5.5     | MP6-XT22 | BioLegend |
| Granzyme B                             | PerCP-Cy5.5          | QA16A02  | BioLegend |
| SIINFEKL/H-2K <sup>b</sup>             | PE, APC              | 25-D1.16 | BioLegend |
| SIINFEKL/H-2K <sup>b</sup><br>Tetramer | PE                   | -        | MBL       |

**Table S2. Primer sequences for real-time PCR**

| Target gene  | Forward (5'-3')         | Reverse (5'-3')         |
|--------------|-------------------------|-------------------------|
| <i>Il1b</i>  | GCAACTGTTCTGAACTCAACT   | ATCTTTTGGGGTCCGTCAACT   |
| <i>Il6</i>   | CCAAGAGGTGAGTGCTTCCC    | CTGTTGTTCACTCTCTCCCT    |
| <i>Il12a</i> | CCCTTGCCCTCCTAAACCAC    | AAGGAACCCTTAGAGTGCTTACT |
| <i>Il12b</i> | TGGTTTGCCATCGTTTTGCTG   | ACAGGTGAGGTTCACTGTTTCT  |
| <i>Tnf</i>   | GACGTGGAAGTGGCAGAAGAG   | TTGGTGTTTTGTGAGTGTGAG   |
| <i>Nos2</i>  | GTTCTCAGCCCAACAATACAAGA | GTGGACGGGTCGATGTCAC     |
| <i>Il4</i>   | GGTCTCAACCCCCAGCTAGT    | GCCGATGATCTCTCTCAAGTGAT |
| <i>Il10</i>  | GCTCTTACTGACTGGCATGAG   | CGCAGCTCTAGGAGCATGTG    |
| <i>Il13</i>  | CCTGGCTCTTGCTTGCCTT     | GGTCTTGTGTGATGTTGCTCA   |
| <i>Arg1</i>  | CTCCAAGCCAAAGTCCTTAGAG  | AGGAGCTGTCATTAGGGACATC  |
| <i>Glut1</i> | CAGTTCGGCTATAACACTGGTG  | GCCCCCGACAGAGAAGATG     |
| <i>Hk2</i>   | TGATCGCCTGCTTATTCACGG   | AACCGCCTAGAAATCTCCAGA   |
| <i>Pkm2</i>  | GCCGCCTGGACATTGACTC     | CCATGAGAGAAATTCAGCCGAG  |
| <i>Ldh1</i>  | TGTCTCCAGCAAAGACTACTGT  | GACTGTACTTGACAATGTTGGGA |
| <i>Hif1a</i> | ACCTTCATCGGAAACTCCAAAG  | ACTGTTAGGCTCAGGTGAACT   |
| <i>Ppara</i> | AGAGCCCCATCTGTCCTCTC    | ACTGGTAGTCTGCAAAACCAAA  |
| <i>Pparg</i> | TCGCTGATGCACTGCCTATG    | GAGAGGTCCACAGAGCTGATT   |
| <i>Cpt1a</i> | CTCCGCCTGAGCCATGAAG     | CACCAGTGATGATGCCATTCT   |
| <i>Cpt1b</i> | GCACACCAGGCAGTAGCTTT    | CAGGAGTTGATTCCAGACAGGTA |
| <i>Cpt2</i>  | CAGCACAGCATCGTACCCA     | TCCCAATGCCGTTCTCAAAAT   |
| <i>Rxra</i>  | ATGGACACCAAACATTTCTGTC  | CCAGTGAGAGCCGATTCC      |
| <i>Gapdh</i> | AGGTCGGTGTGAACGGATTG    | TGTAGACCATGTAGTTGAGGTCA |

## Supplementary Figure

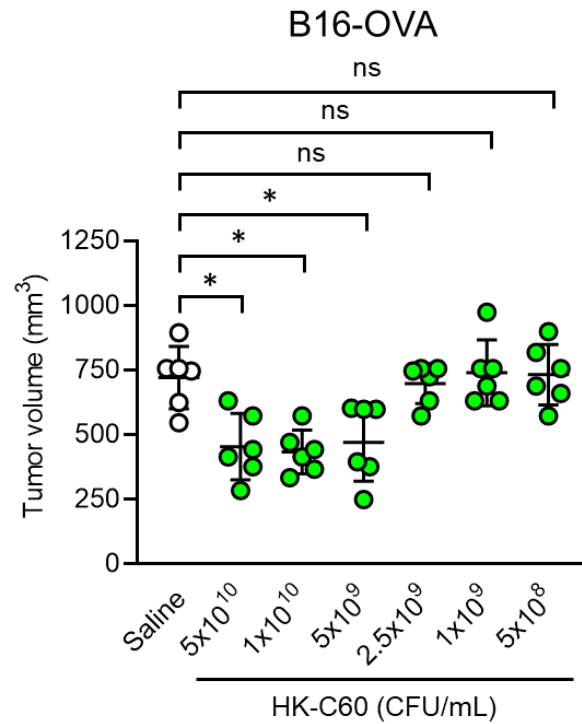

**Figure S1.** Tumor growth in murine melanoma model at different doses of HK-C60. Oral administration and tumor inoculation was performed by following protocol represented in Figure 1A. The mice first received oral administration of saline, HK-C60 (indicated CFU/mL) for 14 days, and B16-OVA cells were inoculated by s.c. injection into back skin (n=6 in each group). The tumor volumes were measured after 14 days of tumor inoculation (in day 28 of oral administration). The cumulative data were shown as mean  $\pm$  SD. One-way ANOVA was used to analyze data for significant differences. Values of  $*p < 0.01$  was regarded as significant.

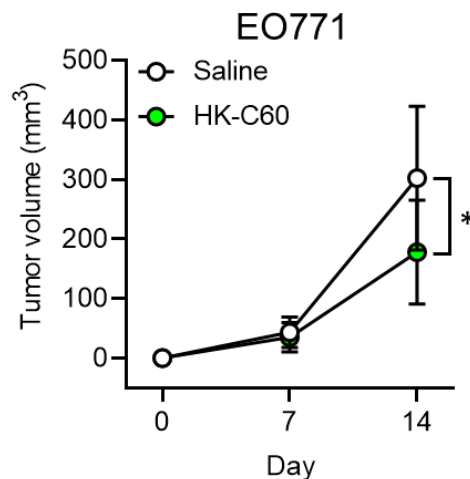

**Figure S2.** Tumor growth in murine breast cancer model. Oral administration and tumor inoculation was performed by following protocol represented in Figure 1A. The murine breast cancer model was established by intramammary (i.m.) injection of EO771 cells ( $2.0 \times 10^6$  cells/100  $\mu$ L of PBS) into the mice (n=10 in each group). The tumor volumes were measured is 7 and 14 days of tumor inoculation (in day 21 and 28 of oral administration). The cumulative data were shown as mean  $\pm$  standard error (SD). Student *t*-test was used to analyze data for significant differences. Values of  $*p < 0.05$  was regarded as significant.

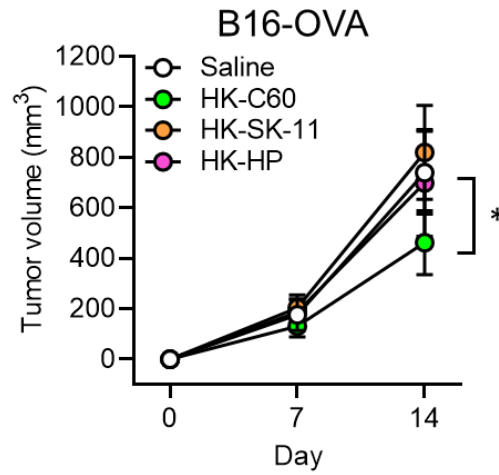

**Figure S3.** C60 specifically suppresses tumor growth in murine melanoma. The murine melanoma model was established by B16-OVA inoculation following the protocol represented in Figure 1A. The mice first received oral administration of saline, HK-C60, HK-SK-11 or HK-HP for 14 days, and B16-OVA cells were inoculated by s.c. injection into back skin ( $n=10$  in each group). The tumor volumes were measured in 7 and 14 days of tumor inoculation (in day 21 and 28 of oral administration). The cumulative data were shown as mean  $\pm$  SD. Student  $t$ -test was used to analyze data for significant differences. Values of  $*p < 0.01$  was regarded as significant.

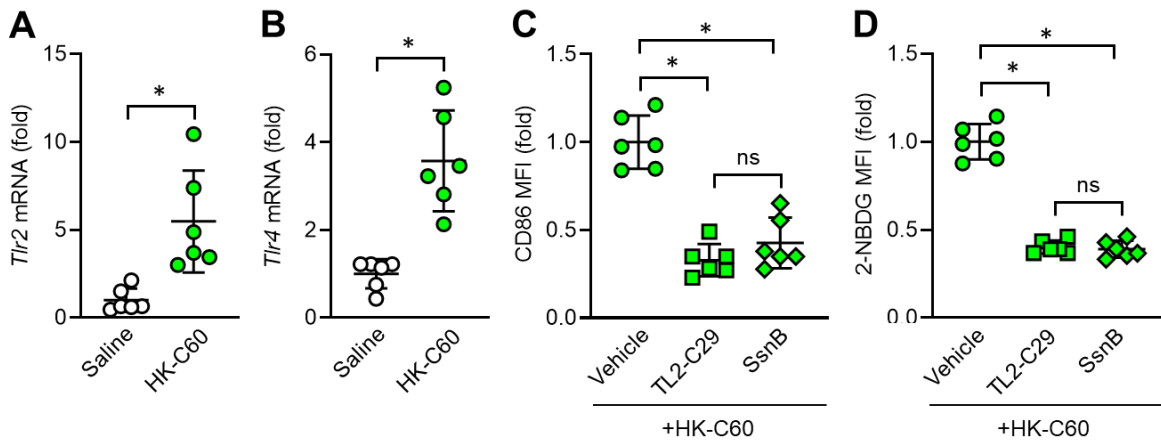

**Figure S4.** TLR-dependent cellular activation and upregulation of glucose uptake in TPMs. A-B) Gene expressions of TLRs in TPMs. TPMs were cultured with vehicle (PBS) or HK-C60, then mRNA expressions of TLR2 (A) and TLR4 (B) were quantified by real-time PCR. Fold change of mRNA expression was calculated by following the expression in target sample vs control sample (as a base=1). C) CD86 expression of TPMs. TPMs were pre-treated with vehicle (DMSO), TL2-C29 or SsnB following HK-SA stimulation. The CD86 expressions were analyzed by flow cytometry. D) Glucose uptake in TPMs. TPMs were pre-treated with the same condition described in (C) followed by glucose uptake activities were analyzed by flow cytometry. Fold expression change of mean fluorescence intensity (MFI) was calculated by following the molecule expression in the target sample vs control sample (as a base=1) in flow cytometry analysis. The cumulative data were shown as mean  $\pm$  SD of six samples. Student  $t$ -test or one-way ANOVA was used to analyze data for significant differences. Values of  $*p < 0.01$  was regarded as significant. ns: not significant.

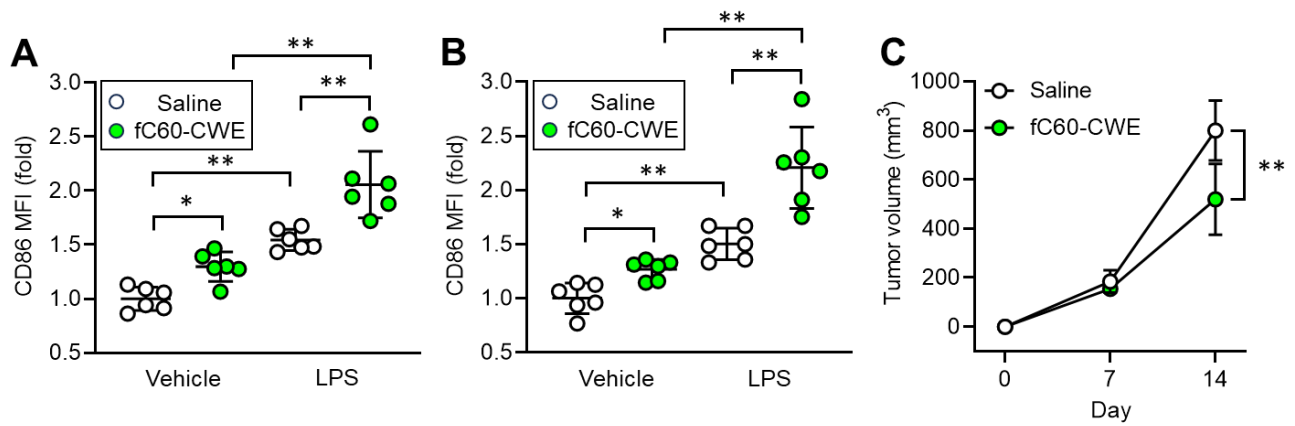

**Figure S5.** Fragmented C60-CWE has the same effect to HK-C60 in macrophage functional modification. A-B) *In vitro* macrophage stimulation assay. Macrophages were isolated from spleen of liver of the mice received i.p. injection of saline or fC60-CWE every day for 14 days. The macrophages were cultured with vehicle (PBS) or LPS, then cell activation statuses were analyzed by flow cytometry. A) CD86 expression of spleen macrophages. B) CD86 expression of liver macrophages. C) B16-OVA-derived tumor growth. The mice received i.p. injection of saline or fC60-CWE every day for 28 days. At day 14 of i.p. injection, B16-OVA cells were inoculated to their back skin by s.c. injection. The tumor volumes were measured at day 7 and 14 of post tumor inoculation. ( $n=10$  in each group). The cumulative data were shown as mean  $\pm$  SD of six or ten samples. Student *t*-test or one-way ANOVA was used to analyze data for significant differences. Values of  $*p < 0.01$  or  $**p < 0.001$  was regarded as significant.
